1 Temporal changes in the positivity rate of common enteric viruses among paediatric admissions in  
2 coastal Kenya, in the period spanning the COVID-19 pandemic, 2019-2022

3

4 **Authors:**

5 Arnold W. Lambisia<sup>1, \*</sup>, Nickson Murunga<sup>1</sup>, Martin Mutunga<sup>1</sup>, Robinson Cheruiyot<sup>1</sup>, Grace  
6 Maina<sup>1</sup>, Timothy O. Makori<sup>1</sup>, D. James Nokes<sup>1,2</sup>, Charles N. Agoti<sup>1,3</sup>

7

8 **Author Affiliations:**

9 <sup>1</sup> Kenya Medical Research Institute-Wellcome Trust Research Programme (KWTRP), P.O Box  
10 230-80108 Kilifi, Kenya.

11 <sup>2</sup>School of Life Sciences and Zeeman Institute for Systems Biology and Infectious Disease  
12 Epidemiology Research (SBIDER), University of Warwick, CV4 7AL Coventry, United Kingdom.

13 <sup>3</sup> Department of Public Health, Pwani University, Kilifi P.O. Box 195-80108, Kenya.

14

15 \*Corresponding author:

16 Contact details: P.O. Box 230, Kilifi-80108, Kenya,

17 Email: [alambisia@kemri-wellcome.org](mailto:alambisia@kemri-wellcome.org)

18

19 **Key words:** Enteric viruses, COVID-19, Rotavirus A, positivity rate, Kenya, paediatrics

20 **Abstract**

21 **Background**

22 The non-pharmaceutical interventions (NPIs) implemented to curb the spread of SARS-CoV-2  
23 early in the COVID-19 pandemic years, disrupted the activity of other respiratory viruses.  
24 There is limited data from low-and-middle income countries (LMICs) to determine whether  
25 COVID-19 NPIs also impacted the epidemiology of enteric viruses. We investigated the  
26 changes in infection patterns of common enteric viruses among hospitalised children who  
27 presented with diarrhoea to a referral hospital in coastal Kenya, in the period spanning the  
28 COVID-19 pandemic.

29  
30 **Methods**

31 A total of 870 stool samples from children under 13 years of age admitted to Kilifi County  
32 Hospital between January 2019, and December 2022 were screened for rotavirus group A  
33 (RVA), norovirus genogroup II (GII), astrovirus, sapovirus, and adenovirus type F40/41 using  
34 real-time reverse-transcription polymerase chain reaction. The proportions positive across the  
35 four years were compared using the chi-squared test statistic.

36  
37 **Results**

38 One or more of the five virus targets were detected in 282 (32.4%) cases. A reduction in the  
39 positivity rate of RVA cases was observed from 2019 (12.1%, 95% confidence interval (CI) 8.7%  
40 -16.2%) to 2020 (1.7%, 95% CI 0.2% – 6.0%;  $p < 0.001$ ). However, in the 2022, RVA positivity  
41 rate rebounded to 23.5% (95% CI 18.2% - 29.4%). For norovirus GII, the positivity rate  
42 fluctuated over the four years with its highest positivity rate observed in 2020 (16.2%; 95%  
43 C.I, 10.0% – 24.1%). No astrovirus cases were detected in 2020 and 2021, but the positivity  
44 rate in 2022 was similar to that in 2019 (3.1% (95% CI 1.5% - 5.7%) vs 3.3% (95% CI 1.4% –  
45 6.5%)). A higher case fatality rate was observed in 2021 (9.0%) compared to the 2019 (3.2%),  
46 2020 (6.8%) and 2022 (2.1%) ( $p < 0.001$ ).

47  
48 **Conclusion**

49 Our study finds that in 2020 the transmission of common enteric viruses, especially RVA and  
50 astrovirus, in Kilifi Kenya may have been disrupted due to the COVID-19 NPIs. After 2020, local

51 enteric virus transmission patterns appeared to return to pre-pandemic levels coinciding with  
52 the removal of most of the government COVID-19 NPIs.

## 53 Introduction

54 Although water sanitation and hygiene (WASH) programmes and new vaccine introductions  
55 have resulted in significant reductions of paediatric diarrhoea morbidity and mortality  
56 globally, virus-associated diarrhoea is still a major cause of hospital admissions in several low  
57 and middle-income settings<sup>1</sup>. In 2019, approximately 300,000 deaths were recorded globally  
58 in children below 14 years of age due to rotavirus group A (RVA), norovirus GI and GII, and  
59 adenovirus 40/41 infections<sup>2</sup>.

60

61 Following the emergence of COVID-19, a number of reports have indicated perturbations in  
62 in seasonality, prevalence and incidence of common enteric viruses associated with diarrhoea  
63 disease. For instance, in France<sup>3</sup>, Poland<sup>4</sup>, China<sup>5,6</sup> and USA<sup>7</sup>, the prevalence of RVA during  
64 the year 2020 was lower compared to 2018 and 2019. However, in 2021 there was a surge of  
65 RVA cases in these countries. Like RVA, a decrease in cases of norovirus GII, sapovirus,  
66 adenovirus 40/41 and astrovirus was reported in 2020 in Spain<sup>8</sup> and Korea<sup>9</sup> compared to  
67 previous years. However, this decrease in virus detection has been followed by remarkable  
68 outbreaks in 2021<sup>5,10</sup>. Sporadic outbreaks of norovirus have also been reported in China in  
69 September 2020 and in the USA, where a total of 992 norovirus outbreaks were reported  
70 between August 2021 and July 2022<sup>5,11,12</sup>. The decline of the detection rates of enteric viruses  
71 in the early COVID-19 pandemic phase has been postulated to be a result of the stringent non-  
72 pharmaceutical interventions (NPIs) that were implemented to abrogate the pandemic<sup>13</sup>.  
73 Some of the measures included those that may impact enteric pathogen transmission such as  
74 frequent hand washing, increased hygiene, social distancing, closure of restaurants and  
75 restricted movement either locally or internationally<sup>13</sup>.

76

77 In coastal Kenya, the prevalence of enteric viruses over the past decade has been monitored  
78 and no significant change in the prevalence has been detected in all the viruses except for  
79 sapovirus (7.6% vs 4.0%, *p value* <0.05) pre-post rotavirus vaccine introduction in July 2014<sup>14</sup>.  
80 RVA positivity in hospital admissions decreased significantly only among ELISA detected cases  
81 but not RT-PCR detected cases<sup>15</sup>. Continuous monitoring of these enteric viruses that  
82 commonly cause diarrhoea in childhood is key in providing insights on their epidemiology for  
83 disease management and informing public health policy. In this study, we aimed to describe

84 the epidemiological patterns of common enteric viruses associated with diarrhoea between  
85 January 2019 and December 2022, during a period spanning the COVID-19 pandemic.

86

## 87 **Methods**

### 88 **Study site and population**

89 This study was undertaken as part of our routine surveillance of RVA in Kilifi County Hospital  
90 (KCH), Kenya <sup>14,16,17</sup>. To be recruited, a participant had to satisfy the following criteria: (a)  
91 admitted with diarrhoea as one of their illness symptom(s), (b) aged < 13-year-old, (c) consent  
92 given from a parent or guardian to be in the study <sup>14,16,17</sup> The surveillance started in 2009 and  
93 has continued to date (2023). In this analysis we focused on participants recruited between  
94 1<sup>st</sup> January 2019 and 31<sup>st</sup> December 2022.

95

### 96 **Laboratory methods.**

#### 97 **Molecular testing for common enteric viruses**

##### 98 ***Total Nucleic Acid (TNA) Extraction***

99 TNA was extracted from 0.2 grams of stool (or 200ul if liquid) using the QIAamp Fast DNA Stool  
100 Mini kit (Qiagen, Manchester, UK) and eluted in 200ul of elution buffer as previously described  
101 <sup>14,16</sup>.

102

##### 103 ***Virus (RT)-PCR Screening***

104 The extracted TNA was combined with the TaqMan Fast Virus 1-step master mix and virus  
105 specific primers (**supplementary table 1**) for each of the five viruses <sup>16,18</sup> and processed on a  
106 real-time Quantistudio 5-flex instrument. The reaction mix comprised 2.5µl of the TaqMan  
107 master mix, 1.2µl of the primer-probe mix, 3.8µl of nuclease free water and 5µl of TNA. The  
108 thermocycling conditions were as follows; 95°C for 20 sec and 35 cycles of 94°C for 15 sec and  
109 60°C for 30 sec. A cycle threshold cut-off of < 35.0 was applied to determine virus positive  
110 samples for all targets screened.

111

##### 112 **RVA genotyping**

113 TNA from RVA positives were amplified using segment specific primers, sequenced on the  
114 Illumina Miseq platform as previously described <sup>19</sup>. Genomes were assembled from the short

115 read data using a de novo assembly approach as previously described<sup>19</sup>. RVA genotypes were  
116 assigned using either BLAST or an online RVA genotyping tool<sup>20</sup>.

117

### 118 **Statistical Analysis**

119 All statistical analysis was undertaken using R version 4.1.1 (2021-08-10). The level of  
120 government intervention was summarised using the Oxford Stringency index (SI), a composite  
121 measure based on nine response indicators including school closures, workplace closures, and  
122 travel bans, rescaled to a value from 0 to 100 (100 = strictest)<sup>21</sup>. Local stringency measures  
123 have been highlighted elsewhere<sup>22</sup> and summarized in supplementary table 2.

124

125 The virus positivity rate during each year was calculated as the proportion of samples that  
126 tested positive for the given virus given the total number of samples tested in the defined  
127 year. The data from 2019 has been previously published elsewhere and formed a reference  
128 base of the situation before COVID-19<sup>16</sup>. Comparisons across different years and groups were  
129 done using the chi-squared test statistic. Kruskal Wallis and Wilcoxon rank-sum tests were  
130 used to compare the distribution of continuous variables. Disease severity was estimated  
131 using the Vesikari Clinical Severity Scoring System Manual as previously described<sup>16,23</sup>.

132 **Results**

133 **Basic demographic characteristics**

134 Between January 2019 and December 2022, 1,613 patients aged under 13 years presented  
135 with diarrhoea as one of their illness symptoms at KCH. Of these, 870 (54.0%) consented  
136 enrolment into the study, gave a stool sample, and were included in this analysis. The reasons  
137 for missed sample collection in the study were: consent refusal (n=344), other (n=133), death  
138 (n=68), discharged before sample collection(n=35) and transferred before sample collection  
139 (n=3).

140

141 All the 870 stool samples were screened for the five enteric viruses namely, RVA, norovirus  
142 GII, astrovirus, sapovirus and adenovirus F40/41. The majority of the recruited patients were  
143 in their first year of life (n=371, 42.6%) and all suffered moderate-to-severe diarrhoeal disease  
144 (**Table 1**). The characteristics of the observed cases across the four years in terms of gender  
145 and age were similar (*p value > 0.05*). However, fatal outcome appeared more likely to occur  
146 in 2021 (9.0%) compared to 2019 (3.2%), 2020 (6.8%) and 2022 (2.1%) (*p value < 0.001*, **Table**  
147 **1**). Less severe disease was also reported in 2020 compared to the other three years, **Table 1**.

148 **Table 1:** Demographic characteristics of children under 13 years admitted to Kilifi County  
 149 Hospital, Kenya between January 2019 and December 2022

|                                                       | 2019<br>(n=314) * | 2020<br>(n=117)   | 2021<br>(n=201)   | 2022<br>(n=238)   | Total<br>(n=870)  | P value |
|-------------------------------------------------------|-------------------|-------------------|-------------------|-------------------|-------------------|---------|
| <b>Sex</b>                                            |                   |                   |                   |                   |                   | 0.586   |
| Female                                                | 137 (43.6%)       | 45 (38.5%)        | 81 (40.3%)        | 107 (45.0%)       | 370 (42.5%)       |         |
| Male                                                  | 177 (56.4%)       | 72 (61.5%)        | 120 (59.7%)       | 131 (55.0%)       | 500 (57.5%)       |         |
| <b>Median age in months<br/>(Interquartile range)</b> | 14.0 (8.0 – 25.0) | 13.7 (8.1 – 27.0) | 13.0 (7.5 – 23.4) | 13.2 (8.5 – 21.3) | 13.7 (8.1 – 23.0) |         |
| <b>Age strata (months)</b>                            |                   |                   |                   |                   |                   | 0.252   |
| <12                                                   | 128 (40.8%)       | 51 (43.6%)        | 89 (44.3%)        | 103 (43.3%)       | 371 (42.6%)       |         |
| 12 -23                                                | 102 (32.5%)       | 36 (30.8%)        | 64 (31.8%)        | 86 (36.1%)        | 288 (33.1%)       |         |
| 24 -59                                                | 56 (17.8%)        | 13 (11.1%)        | 33 (16.4%)        | 35 (14.7%)        | 137 (15.7%)       |         |
| >60                                                   | 28 (8.9%)         | 17 (14.5%)        | 15 (7.5%)         | 14 (5.9%)         | 74 (8.5%)         |         |
| <b>Outcome</b>                                        |                   |                   |                   |                   |                   | <0.001  |
| Alive                                                 | 276 (87.9%)       | 109 (93.2%)       | 183 (91.0%)       | 231 (97.1%)       | 799 (91.8%)       |         |
| Dead                                                  | 10 (3.2%)         | 8 (6.8%)          | 18 (9.0%)         | 5 (2.1%)          | 41 (4.7%)         |         |
| Data missing                                          | 28 (8.9%)         | 0 (0.0%)          | 0 (0.0%)          | 2 (0.8%)          | 30 (3.4%)         |         |
| <b>Disease severity</b>                               |                   |                   |                   |                   |                   | 0.01    |
| Moderate                                              | 90 (28.7%)        | 47 (40.2%)        | 45 (22.4%)        | 65 (27.3%)        | 247 (28.4%)       |         |
| Severe                                                | 224 (71.3%)       | 70 (59.8%)        | 156 (77.6%)       | 173 (72.7%)       | 623 (71.6%)       |         |

\*Pre-pandemic data has been reported in an earlier manuscript <sup>16</sup>

150

151 **Trends in diarrhoeal cases in the context of the COVID-19 pandemic**

152 After the initial detection of the first COVID-19 case in Kenya on 12<sup>th</sup> March 2020 <sup>24</sup>, the  
 153 government implemented a range of NPIs to curb the pandemic (summarised in Figure 1a  
 154 using the Oxford Stringency index and local restrictions listed in supplementary table 2). The  
 155 trend of monthly recorded diarrhoea cases recruited into our surveillance between January  
 156 2019 and December 2022 is shown in **Figure 1b**. The highest monthly peak in cases was  
 157 recorded in 2019 before the COVID-19 pandemic. The lowest number of diarrhoea cases was  
 158 in the 2020, but a gradual rebound was observed in 2021 and 2022.

159



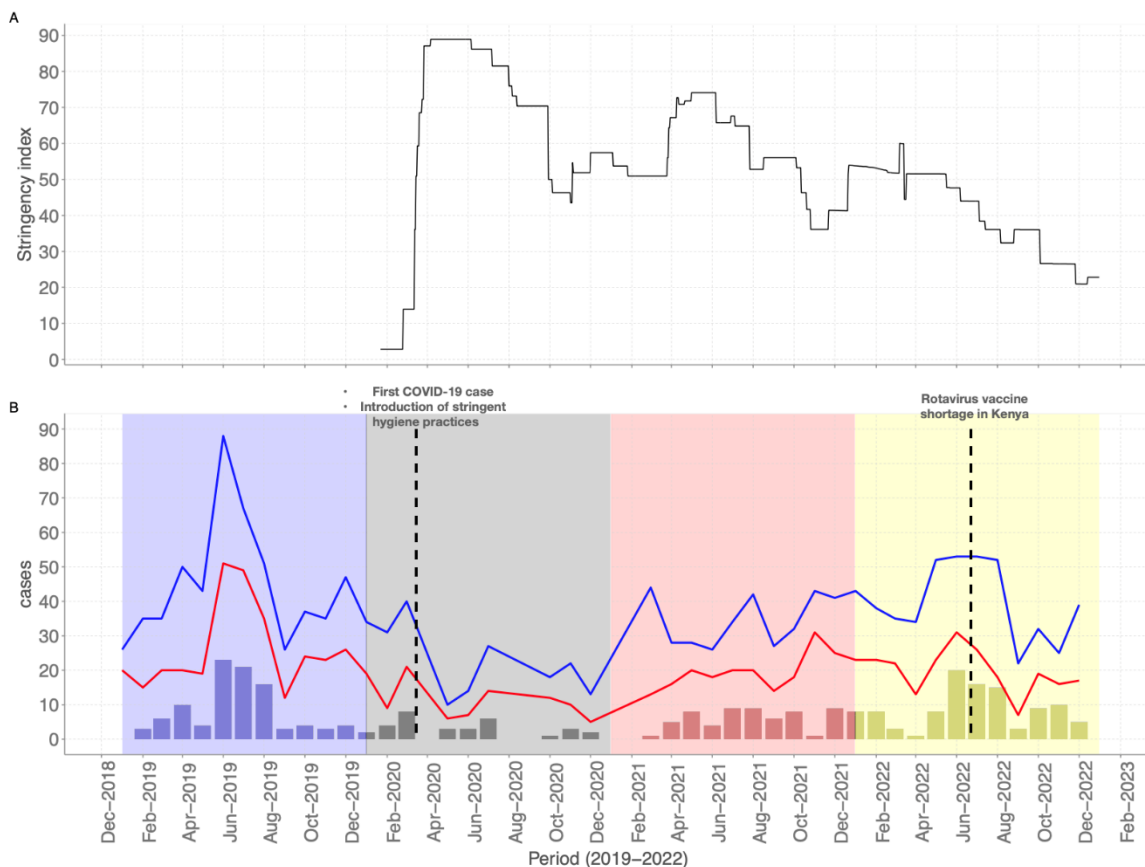

160

161 **Figure 1: A)** COVID-19 stringency index quantifying the government NPI measures aimed to  
 162 curb the spread of SARS-CoV-2 (source: <https://ourworldindata.org/covid-stringency-index>).  
 163 B) Temporal trends of monthly diarrhoea and virus cases between January 2019 and  
 164 December 2022. The blue and red line graphs show the total eligible and recruited diarrhoea  
 165 cases respectively, while the bar graphs show the total virus positive cases per month.

166

### 167 **Single virus infections and coinfections**

168 At least one of the five virus targets were detected in 282 (32.4%) cases. The proportion of  
 169 samples positive for the five viruses we tested in the stool samples for the different years is  
 170 summarised in table 1. The positivity rate of RVA deeped in 2020, at 1.7% (95% C.I, 0.2% –  
 171 6.0%) compared to 2019 (12.1% (95% C.I, 8.7%-14.9%) and gradually rose in 2021 (16.9% (95%  
 172 C.I, 12.0% - 22.8%)) and 2022 (23.5% (95% C.I, 18.2% - 29.4%)) and the differences were  
 173 statistically significant (p value < 0.001) **(Table 2)**.

174

175 The norovirus GII positivity rate fluctuated over the four years and the difference was  
 176 statistically significant (p value 0.04) **(Table 2)**. The highest positivity rate for norovirus GII was

177 16.2% (95% C.I, 10.0% – 24.1%) in 2020 and lowest at 6.4% (95% C.I, 3.4% – 10.8%) in 2021  
 178 **(Table 2)**. No astrovirus cases were detected in the 2020 and 2021, but the cases in 2022  
 179 (3.3%) with a similar positivity rate to what was reported in 2019 (3.1%, **Table 2**). The positivity  
 180 rates for sapovirus and adenovirus type F40/41 did not change across the three phases (*p*  
 181 *value* > 0.05,  $\chi^2$ ).

182

183 **Table 2:** Comparison of the detection rates of five common enteric virus between January  
 184 2019 and December 2022

| Virus             | Total (n=870) | 2019 (n=314) |                     | 2020 (n=117) |                     | 2021 (n=201) |                     | 2022 (n=238) |                     | P value |
|-------------------|---------------|--------------|---------------------|--------------|---------------------|--------------|---------------------|--------------|---------------------|---------|
|                   |               | Cases        | Proportion (95% CI) | Cases        | Proportion (95% CI) | Cases        | Proportion (95% CI) | Cases        | Proportion (95% CI) |         |
| Rotavirus         | 130 (14.9%)   | 38           | 12.1 (8.7 - 16.2)   | 2            | 1.7 (0.2 - 6.0)     | 34           | 16.9 (12.0 - 22.8)  | 56           | 23.5 (18.2 - 29.4)  | <0.001  |
| Norovirus GII     | 89 (10.2%)    | 34           | 10.8 (7.6 - 14.8)   | 19           | 16.2 (10.0 - 24.1)  | 13           | 6.4 (3.4 - 10.8)    | 23           | 9.6 (6.2 - 14.1)    | 0.04    |
| Astrovirus        | 18 (2.1%)     | 10           | 3.1 (1.5 - 5.7)     | 0            | -                   | 0            | -                   | 8            | 3.3 (1.4 - 6.5)     | 0.01    |
| Sapovirus         | 33 (3.8%)     | 11           | 3.5 (1.7 - 6.1)     | 3            | 2.5 (0.5 - 7.3)     | 7            | 3.4 (1.4 - 7.0)     | 12           | 5.0 (2.6 - 8.6)     | 0.65    |
| Adenovirus F40/41 | 30 (3.4%)     | 9            | 2.8 (1.3 - 5.3)     | 8            | 6.8 (2.9 - 13.0)    | 6            | 2.9 (1.1 - 6.3)     | 7            | 2.9 (1.1 - 5.9)     | 0.19    |

185

186 Between 2019 and 2022, 13 samples had a coinfection of two or more viruses of the screened  
 187 viruses. The most common coinfections were RVA and norovirus GII (n=4), adenovirus 40/41  
 188 and astrovirus (n=3), and adenovirus 40/41 and sapovirus (n=3) (**Supplementary table 3**).

189

### 190 **Monthly virus trends**

191 In all the years, peak RVA cases were observed in the month of August, except in 2020 where  
 192 only two RVA cases were detected, **Figure 2**. The peak months for norovirus GII varied across  
 193 the different years. Less than five cases were reported over the four years for adenovirus  
 194 40/41, sapovirus and astrovirus in each month. In 2020 and 2021, no astrovirus cases were  
 195 detected but re-emerged in 2022 (**Figure 2**).

196

197

198

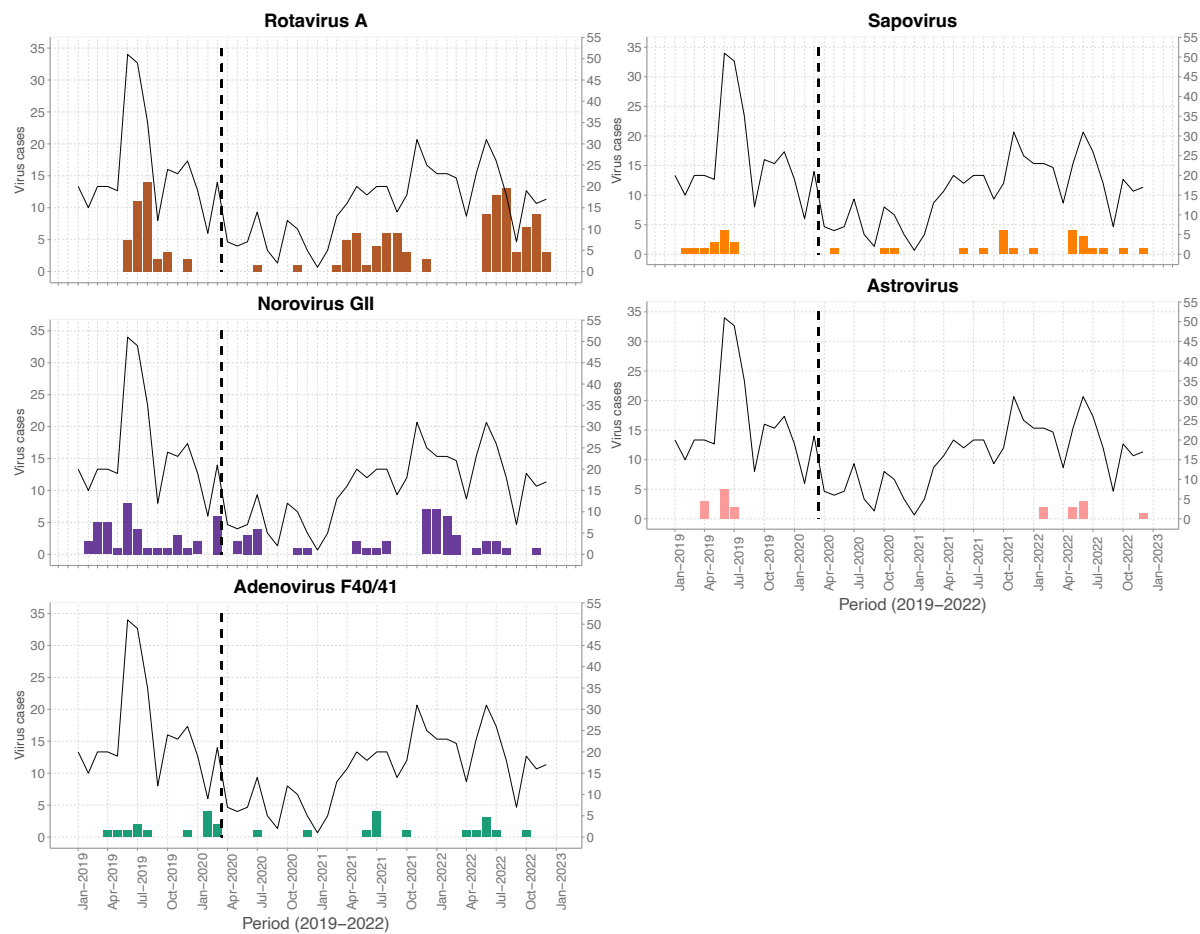

199

200 **Figure 2:** Monthly temporal distribution of common enteric virus cases in children under 13  
 201 years admitted to KCH with diarrhoea between January 2019 and December 2022. The black  
 202 trendline shows the monthly diarrhoeal cases over time and the vertical dotted line represents  
 203 when the first COVID-19 case was detected in Kenya.

204

205

206 **RVA genotypes and vaccination status of positive cases**

207 Of the 130 RVA positive detected during the study, 87 (66.9%) and 70 (53.8%) successively  
 208 sequenced in the VP7 and VP4 segment, respectively. The years 2019, 2020 and 2021 were  
 209 predominated by the G3P[8] genotype (n=48, 80.0%). In 2022, we observed replacement of  
 210 the G3P[8] genotype with multiple genotypes: G2P[4] (n=2), G9P[8] (n=10), and G9P[4] (n=4).  
 211 To note, in the 2022 there was some incomplete genotyping due to failed sequencing in the  
 212 VP4 and VP7 segments G2P[x] (n=5) and GxP[8] (n=8), Among the 130 RVA positive cases, 88

213 (67.7%) had received at least one dose of the Rotarix<sup>®</sup> vaccine two doses, 18 (12.9%) had not  
214 received a vaccine and 24 (16.9%) had no vaccination records. One participant was RVA  
215 positive five days after receiving a Rotarix dose and their sample genotyped as G3P[8].

216

217

#### 218 **Disease outcome**

219 In the study, a total of 41 (4.7%) cases succumbed among the 870 that we analysed. Only nine  
220 of these cases were positive for at least of the viruses we tested i.e., norovirus GII (n=4),  
221 adenovirus type F40/41 (n=2), RVA (n=1), sapovirus (n=1) and a coinfection (RVA & sapovirus,  
222 n=1) (**Supplementary Figure 2**). The other 32 cases had none of the five viruses detected.

## 223 Discussion

224 In this coastal Kenya hospital-based study, we observed a decrease in paediatric diarrhoea  
225 admissions in during the first year of the COVID-19 pandemic (2020) compared to the pre-  
226 pandemic year (2019). This decline may be attributed in part to be a result of the  
227 implementation of NPIs such as restriction of movement and increased hygiene practices that  
228 may have led to reduce transmission of the enteric pathogens as observed elsewhere<sup>8</sup> and  
229 the overall reduced access to the hospital occasioned by health worker strike between  
230 December 2020. Peak diarrhoea cases are usually observed between June and July and in  
231 2020 and 2021, this period coincided with high stringency measures in the country. After  
232 March 2021, targeted vaccination campaigns started replacing NPIs and from August 2021,  
233 the government dropped measures including closure of schools, curfews, lockdowns and  
234 public gatherings and restrictions in public transport.

235

236 We report a significant decrease in RVA positivity rate in 2020 compared to 2019 followed by  
237 a rebound in 2021 and 2022, a finding consistent with other studies elsewhere<sup>4,6-8</sup>. Notably,  
238 the positivity rate of RVA in 2022 was higher compared to all the previous years. Such a  
239 resurgence of RVA activity was also observed in Hong Kong after the first year of the  
240 pandemic<sup>5</sup>.

241

242 The return and increase of RVA activity in the 2021 and 2022 can be attributed in part to the  
243 relaxation of the COVID-19 NPIs or circulation of strains heterologous to the Rotarix vaccine  
244 (e.g. G9P[8], G9P[4] and G2P[4]). Some of these strains have been noted to have limited cross-  
245 reactivity with the Rotarix G1P[8] strain. Further, vaccination delays and Rotarix<sup>®</sup> vaccine  
246 stockouts that occurred in between June 2022 and January 2023 when a vaccine switch to  
247 Rotavac was made in Kenya<sup>25</sup>. The introduction of G9 genotypes in Malaysia was associated  
248 with an increase RVA prevalence<sup>26</sup> similar to what we observed in 2022 whereby the G3P[8]  
249 were rapidly replaced by the G9P[8], G9P[4] and G2P[4] genotypes and subsequently there  
250 was an increase in RVA cases.

251

252 In Kilifi, the prevalence of norovirus GII has been on the rise post-rotavirus vaccine  
253 introduction compared to the pre-vaccine period<sup>14,16</sup>. Interestingly, the positivity rate of  
254 norovirus GII was highest in 2020 phase compared to other years. This implies that norovirus

255 activity was less impacted by the NPI measures which is known to be highly infectious. An  
256 increase in norovirus activity and multiple sporadic outbreaks have reported in the USA and  
257 China during the COVID-19 phase <sup>5,11,12</sup>.

258  
259 Notably, astrovirus was not detected in the 2020 and 2021 but re-emerged in the 2022 with a  
260 positivity rate similar to what was observed in 2019. Astrovirus and sapovirus detection on  
261 the Kenyan coast has been always characterised by very low prevalence (<5%) <sup>14,16</sup>.

262  
263 In China, enteric virus coinfections especially with RVA and norovirus was associated with  
264 severe disease <sup>27</sup>. Similarly in coastal Kenya, a coinfection with either RVA or/and norovirus  
265 GII coincided with severe disease. However, its key to note that 71.6% of the participants in  
266 the study presented with severe disease. In 2020, there was a significant difference in  
267 mortality rate (9.0%) compared to the 2019 (3.2%), 2021 (6.8%) and 2022 (2.1). We  
268 hypothesize that the high mortality rate in the 2020 and partly 2021 may have been caused  
269 by the challenges with access to the hospitals and health care services as efforts were geared  
270 towards management of COVID-19 cases.

271  
272 This study had several limitations. We did not analyse healthy controls from the same  
273 population to adjust the aetiological fraction for asymptomatic carriage in the population.  
274 With the small number of detections for some of the virus targets, it hard to confidently infer  
275 seasonality without a larger study. There was substantial data missingness e.g., on deaths and  
276 almost half of the eligible participants refused consent to be in the study. For a conclusive  
277 inference of changes of the incidence of these viruses before during and after the pandemic,  
278 a population-based study with a clear population-based denominator is necessary.

279  
280 In conclusion, our study observed a decrease in total diarrhoea admissions and enteric virus  
281 activity during in 2020 and 2021. However, in 2022 an increase in RVA and astrovirus activity  
282 is restored to pre-pandemic numbers. Therefore, continuous enteric virus surveillance is key  
283 in understanding the temporal changes in positivity rate of these viruses to inform public  
284 health policy.

285

286

287 **Declarations**

288 **Ethics approval and consent to participate.**

289 The research protocol for the study was approved at Kenya Medical Research Institute  
290 (KEMRI), by the Scientific and Ethics Review Unit (SSC#2861) in Nairobi, Kenya.

291 **Acknowledgement**

292 We are grateful to the study participants who provided samples and members of the  
293 pathogen epidemiology and omics group at KEMRI-Wellcome Trust Programme who did  
294 sample collection and laboratory processing. This manuscript was written with the  
295 permission of Director KEMRI CGMRC

296 **Funding.**

297 This study was funded by the Wellcome Trust (102975, 220985 and 226002/Z/22/Z). Dr  
298 Charles Agoti was supported by the Initiative to Develop African Research Leaders (IDeAL)  
299 through the DELTAS Africa Initiative [DEL-15-003]. The DELTAS Africa Initiative is an  
300 independent funding scheme of the African Academy of Sciences (AAS)'s Alliance for  
301 Accelerating Excellence in Science in Africa (AESA) and supported by the New Partnership for  
302 Africa's Development Planning and Coordinating Agency (NEPAD Agency). The views  
303 expressed in this report are those of the authors and not necessarily those of AAS, NEPAD  
304 Agency and The Wellcome. This research was funded in whole or in part by the Wellcome  
305 Trust [102975, 220985 and 226002/Z/22/Z], For the purpose of Open Access, the author has  
306 applied a CC-BY public copyright license to any author accepted manuscript version arising  
307 from this submission.

308 **Consent for publication**

309 Yes.

310 **Competing interests**

311 The authors declare no conflict of interest.

312 **Availability of data and materials**

313 All the data used can be accessed at the KWTRP Research repository via  
314 <https://doi.org/10.7910/DVN/EG6MEH>.

315 **Authors' contributions**

316 CAN and DJN sourced the study funding. CNA, DJN and AWL designed the study laboratory  
317 assay. AWL, MM, TOM, CR, and GM did the laboratory experiments. NM and AWL managed

318 the study data and did the data analysis. AWL and CAN wrote the first manuscript draft. All  
319 authors read, revised, and approved the final manuscript.



## 320 References

- 321 1. Reiner RC, Wiens KE, Deshpande A, Baumann MM, Lindstedt PA, Blacker BF, et al.  
322 Mapping geographical inequalities in childhood diarrhoeal morbidity and mortality in  
323 low-income and middle-income countries, 2000–17: analysis for the Global Burden of  
324 Disease Study 2017. *Lancet* [Internet]. 2020 Jun;395(10239):1779–801. Available  
325 from: <https://linkinghub.elsevier.com/retrieve/pii/S0140673620301148>
- 326 2. Institute for Health Metrics and Evaluation I. Default results are global all-cause  
327 deaths and DALYs for 2019 with trends since 1990 [Internet]. 2022 [cited 2022 Sep  
328 27]. Available from: <https://vizhub.healthdata.org/gbd-results/>
- 329 3. Cohen PR, Rybak A, Werner A, Béchet S, Desandes R, Hassid F, et al. Trends in  
330 pediatric ambulatory community acquired infections before and during COVID-19  
331 pandemic: A prospective multicentric surveillance study in France. *Lancet Reg Heal -*  
332 *Eur.* 2022;22:1–10.
- 333 4. Toczyłowski K, Jackowska K, Lewandowski D, Kuryłonek S, Waszkiewicz-Stojda M,  
334 Sulik A. Rotavirus gastroenteritis in children hospitalized in northeastern Poland in  
335 2006–2020: Severity, seasonal trends, and impact of immunization. *Int J Infect Dis*  
336 [Internet]. 2021;108:550–6. Available from:  
337 <https://doi.org/10.1016/j.ijid.2021.05.070>
- 338 5. Chan MCW. Return of Norovirus and Rotavirus Activity in Winter 2020–21 in City with  
339 Strict COVID-19 Control Strategy, China. *Emerg Infect Dis* [Internet]. 2022  
340 Mar;28(3):713–6. Available from: [https://wwwnc.cdc.gov/eid/article/28/3/21-](https://wwwnc.cdc.gov/eid/article/28/3/21-2117_article.htm)  
341 [2117\\_article.htm](https://wwwnc.cdc.gov/eid/article/28/3/21-2117_article.htm)
- 342 6. Fang C, Zhou Z, Li J, Zhou M. Incident changes of rotavirus enteritis among children  
343 during the coronavirus disease-2019 pandemic in Hangzhou, China. *J Infect* [Internet].  
344 2022 Jan;84(1):e9–10. Available from: <https://doi.org/10.1016/j.jinf.2021.09.007>
- 345 7. Burnett E, Parashar UD, Winn A, Tate JE. Trends in Rotavirus Laboratory Detections  
346 and Internet Search Volume Before and After Rotavirus Vaccine Introduction and in  
347 the Context of the Coronavirus Disease 2019 Pandemic-United States, 2000-2021. *J*  
348 *Infect Dis* [Internet]. 2022 Sep 21;226(6):967–74. Available from:  
349 <http://www.ncbi.nlm.nih.gov/pubmed/35184198>
- 350 8. Maldonado-Barrueco A, García-Rodríguez J, Yániz-Ramírez J, Serrano-Vaquero I,  
351 Parra-Alonso JC, Vega-Nieto C, et al. Impact of the SARS-CoV-2 Pandemic on the

- 352 Prevalence and Incidence of Gastrointestinal Viruses in Children up to Five Years Old:  
353 a Retrospective Cohort Study. *Microbiol Spectr*. 2022;10(3).
- 354 9. Ahn SY, Park JY, Lim IS, Chae SA, Yun SW, Lee NM, et al. Changes in the Occurrence of  
355 Gastrointestinal Infections after COVID-19 in Korea. *J Korean Med Sci*. 2021;36(24):1–  
356 9.
- 357 10. Douglas A, Sandmann FG, Allen DJ, Celma CC, Beard S, Larkin L. Impact of COVID-19  
358 on national surveillance of norovirus in England and potential risk of increased  
359 disease activity in 2021. *J Hosp Infect*. 2021;112:124–6.
- 360 11. Kambhampati AK, Wikswo ME, Barclay L, Vinjé J, Mirza SA. Norovirus Outbreaks  
361 Reported Through NoroSTAT — 12 States, August 2012–July 2022. *MMWR Recomm*  
362 *Reports*. 2022;71(38):1222–4.
- 363 12. Lu Y, Zhang Z, Xie H, Su W, Wang H, Wang D, et al. The Rise in Norovirus-Related  
364 Acute Gastroenteritis During the Fight Against the COVID-19 Pandemic in Southern  
365 China. *Front Public Heal*. 2022;9(January):1–7.
- 366 13. Zhang W, Wu Y, Wen B, Zhang Y, Wang Y, Yin W, et al. Non-pharmaceutical  
367 interventions for COVID-19 reduced the incidence of infectious diseases: a controlled  
368 interrupted time-series study. *Infect Dis Poverty* [Internet]. 2023;12(1):15. Available  
369 from: <https://doi.org/10.1186/s40249-023-01066-3>
- 370 14. Agoti CN, Curran MD, Murunga N, Ngari M, Muthumbi E, Lambisia AW, et al.  
371 Differences in epidemiology of enteropathogens in children pre- and post-rotavirus  
372 vaccine introduction in Kilifi, coastal Kenya. *Gut Pathog* [Internet]. 2022 Dec  
373 1;14(1):32. Available from:  
374 <https://gutpathogens.biomedcentral.com/articles/10.1186/s13099-022-00506-z>
- 375 15. Lambisia AW. Comparison of the Diagnostic Performance of TaqMan Array Cards,  
376 Enzyme Immunoassay, Real-Time PCR and Next Generation Sequencing in  
377 Investigation of Five Common Diarrhoea-Associated Enteric Viruses in Kilifi, Kenya  
378 [Internet]. JKUAT-COHES; 2021. Available from:  
379 <http://ir.jkuat.ac.ke/handle/123456789/5621>
- 380 16. Lambisia AW, Onchaga S, Murunga N, Lewa CS, Nyanjom SG, Agoti CN.  
381 Epidemiological Trends of Five Common Diarrhea-Associated Enteric Viruses Pre- and  
382 Post-Rotavirus Vaccine Introduction in Coastal Kenya. *Pathogens* [Internet]. 2020 Aug  
383 15;9(8):660. Available from: <https://www.mdpi.com/2076-0817/9/8/660>

- 384 17. Nokes DJ, Abwao J, Pamba A, Peenze I, Dewar J, Maghenda JK, et al. Incidence and  
385 Clinical Characteristics of Group A Rotavirus Infections among Children Admitted to  
386 Hospital in Kilifi, Kenya. *PLOS Med* [Internet]. 2008 Jul 22;5(7):e153. Available from:  
387 <https://doi.org/10.1371/journal.pmed.0050153>
- 388 18. Lambisia AW, Makori TO, Mutunga M, Cheruiyot R, Murunga N, Quick J, et al.  
389 Genomic epidemiology of human adenovirus F40 and F41 in coastal Kenya: A  
390 retrospective hospital-based surveillance study (2013-2022). *Virus Evol*.  
391 2023;9(1):vead023.
- 392 19. Makori TO, Bargul JL, Lambisia AW, Mwanga MJ, Murunga N, de Laurent ZR, et al.  
393 Genomic epidemiology of the rotavirus G2P[4] strains in coastal Kenya pre- and post-  
394 rotavirus vaccine introduction, 2012–8. *Virus Evol* [Internet]. 2023 Jan  
395 1;9(1):vead025. Available from: <https://doi.org/10.1093/ve/vead025>
- 396 20. Vennema H, Kroneman A. Rotavirus A Genotyping Tool [Internet]. [cited 2022 Apr  
397 15]. Available from: <https://www.rivm.nl/mpf/typingtool/rotavirusa/>
- 398 21. Mathieu E, Ritchie H, Rodés-Guirao L, Appel C, Giattino C, Hasell J, et al. Coronavirus  
399 Pandemic (COVID-19). *Our World Data*. 2020;
- 400 22. Brand SPC, Ojal J, Aziza R, Were V, Okiro EA, Kombe IK, et al. COVID-19 transmission  
401 dynamics underlying epidemic waves in Kenya. *Science* (80- ) [Internet]. 2021 Nov  
402 19;374(6570):989–94. Available from:  
403 <https://www.science.org/doi/10.1126/science.abk0414>
- 404 23. Lewis K. Vesikari Clinical Severity Scoring System Manual. *Path* [Internet].  
405 2011;(May):1–50. Available from:  
406 [https://www.path.org/publications/files/VAD\\_vesikari\\_scoring\\_manual.pdf](https://www.path.org/publications/files/VAD_vesikari_scoring_manual.pdf)
- 407 24. Health M of. First case of coronavirus disease confirmed in Kenya. *Press Release*.  
408 2020;1–3.
- 409 25. Standard. Newborns at risk as shortage of the rotavirus vaccine is felt in various  
410 clinics [Internet]. [cited 2023 Jun 2]. Available from:  
411 [https://www.standardmedia.co.ke/health/health-](https://www.standardmedia.co.ke/health/health-science/article/2001448711/newborns-at-risk-as-shortage-of-the-rotavirus-vaccine-is-felt-in-various-clinics)  
412 [science/article/2001448711/newborns-at-risk-as-shortage-of-the-rotavirus-vaccine-](https://www.standardmedia.co.ke/health/health-science/article/2001448711/newborns-at-risk-as-shortage-of-the-rotavirus-vaccine-is-felt-in-various-clinics)  
413 [is-felt-in-various-clinics](https://www.standardmedia.co.ke/health/health-science/article/2001448711/newborns-at-risk-as-shortage-of-the-rotavirus-vaccine-is-felt-in-various-clinics)
- 414 26. Amit LN, John JL, Mori D, Chin AZ, Mosiun AK, Ahmed K. Increase in rotavirus  
415 prevalence with the emergence of genotype G9P[8] in replacement of genotype

416 G12P[6] in Sabah, Malaysia. Arch Virol [Internet]. 2023;168(6):173. Available from:  
417 <https://doi.org/10.1007/s00705-023-05803-9>  
418 27. Zhang SX, Zhou YM, Xu W, Tian LG, Chen JX, Chen SH, et al. Impact of co-infections  
419 with enteric pathogens on children suffering from acute diarrhea in southwest China.  
420 Infect Dis Poverty [Internet]. 2016 Dec 27;5(1):64. Available from:  
421 <http://idpjournal.biomedcentral.com/articles/10.1186/s40249-016-0157-2>  
422
