# Supplementary material for: Temporal changes in the positivity rate of common enteric viruses among paediatric admissions in coastal Kenya, in the period spanning the COVID-19 pandemic, 2019-2022
Source: bioRxiv or medRxiv preprint supplement (doi:10.1101/2023.07.24.23293059), 2023-07-24
Supplement: Supplementary file [file media-1.pdf]

**Supplementary table 1: Primer and probe sequences**

| <b>Virus</b>         | <b>Strand</b> | <b>Sequence</b>            |
|----------------------|---------------|----------------------------|
| <b>Sapovirus</b>     | Primer-F      | CAGGCTCTCGCCACCTAC         |
|                      | Primer-R      | CCCTCCATYTCAAACACTAWTTT    |
|                      | Probe         | TGGTTCATAGGTGGTRC          |
| <b>Astrovirus</b>    | Primer-F      | TCAACGTGTCCGTAAMATTGTCA    |
|                      | Primer-R      | GCWGGTTTTGGTCCTGTGA        |
|                      | Probe         | CAACTCAGGAAACARG           |
| <b>Rotavirus A</b>   | Primer-F      | ACCATCTWCACRTRACCCTCTATGAG |
|                      | Primer-R      | GGTCACATAACGCCCTATAGC      |
|                      | Probe         | AGTTAAAAGCTAACACTGTCAAA    |
| <b>Norovirus GII</b> | Primer-F      | CARGARBCNATGTTYAGRTGGATGAG |
|                      | Primer-R      | TCGACGCCATCTTCATTCACA      |
|                      | Probe         | GAGGGSGATCGCRATCT          |
| <b>Adenovirus</b>    | Primer-F      | CACTTAATGCTGACACGGGC       |
|                      | Primer-R      | ACTGGATAGAGCTAGCGGGC       |
|                      | Probe         | TGCACCTCTTGACTAGT          |
