# Supplementary material for: Temporal changes in the positivity rate of common enteric viruses among paediatric admissions in coastal Kenya, in the period spanning the COVID-19 pandemic, 2019-2022
Source: bioRxiv or medRxiv preprint supplement (doi:10.1101/2023.07.24.23293059), 2023-07-24
Supplement: Supplementary file [file media-2.pdf]

**Supplementary table 2: Counter measures implanted by the Kenyan government to counter the spread of COVID-19 in Kilifi**

| <b>Years</b> | <b>Measures</b>                                                            |
|--------------|----------------------------------------------------------------------------|
| <b>2020</b>  | Travel restriction from other countries with reported COVID cases          |
|              | Ban of social gatherings including churches, weddings, and funerals        |
|              | Restriction of movement into and out of Kilifi county                      |
|              | Closure of schools                                                         |
|              | Compulsory wearing of masks in public                                      |
|              | Ban of local air travel                                                    |
|              | Restriction of restaurants opening hours and offer take-away services only |
|              | Night curfew (7 p.m. to 5 a.m. then 11 p.m. to 4 a.m.)                     |
|              | Suspension of political gatherings and meetings                            |
| <b>2021</b>  | Night curfew                                                               |
|              | Compulsory wearing of masks in public                                      |
|              | COVID-19 vaccination launched                                              |
|              | Cessation of all movement by air, rail, and road in disease infected areas |
|              | Suspension of political gatherings and meetings                            |
| <b>2022</b>  | Compulsory wearing of masks in public (up to March 2022)                   |
|              | Compulsory hand washing (up to March 2022)                                 |
|              | Social distancing (up to March 2022)                                       |
