# Supplementary material for: Temporal changes in the positivity rate of common enteric viruses among paediatric admissions in coastal Kenya, in the period spanning the COVID-19 pandemic, 2019-2022
Source: bioRxiv or medRxiv preprint supplement (doi:10.1101/2023.07.24.23293059), 2023-07-24
Supplement: Supplementary file [file media-3.pdf]

**Supplementary table 3:** Enteric virus coinfections observed in Kilifi, Kenya between 2019 and 2022

|                                  | 2019 | 2020 | 2021 | 2022 |
|----------------------------------|------|------|------|------|
| <b>Coinfection</b>               |      |      |      |      |
| Norovirus GII & Adenovirus_40/41 | -    | 1    | 1    | -    |
| Norovirus GII & Sapovirus        | -    | 1    | -    | -    |
| Rotavirus A & Adenovirus 40/41   | -    | -    | -    | 1    |
| Rotavirus A & Astrovirus         | -    | -    | -    | 2    |
| Rotavirus A & Norovirus GII      | 1    | -    | -    | 1    |
| Rotavirus A & Sapovirus          | 1    | -    | 1    | 2    |
| Sapovirus & Astrovirus           | 2    | -    | -    | -    |
